# Supplementary material for: Robust induction of B cell and T cell responses by a third dose of inactivated SARS-CoV-2 vaccine
Source: bioRxiv or medRxiv preprint supplement (doi:10.1101/2021.09.12.21263373), 2021-11-27
Supplement: Supplementary file [file media-1.pdf]

**Robust induction of B cell and T cell responses by a third dose of  
inactivated SARS-CoV-2 vaccine**

Yihao Liu<sup>1#</sup>, Qin Zeng<sup>2#</sup>, Caiguanxi Deng<sup>3#</sup>, Mengyuan Li<sup>2#</sup>, Liubing Li<sup>4#</sup>, Dayue Liu<sup>5#</sup>, Jie Mei<sup>1</sup>, Ruohui Mo<sup>1</sup>, Qian Zhou<sup>1</sup>, Min Liu<sup>4</sup>, Sui Peng<sup>1</sup>, Ji Wang<sup>3\*</sup>, Hui Zhang<sup>2,3\*</sup>, Haipeng Xiao<sup>6\*</sup>

<sup>1</sup>Clinical Trials Unit, The First Affiliated Hospital of Sun Yat-sen University, Guangzhou 510080, People's Republic of China

<sup>2</sup>Department of Rheumatology and Clinical Immunology, The First Affiliated Hospital of Sun Yat-sen University, Guangzhou, Guangdong, 510080, People's Republic of China

<sup>3</sup>Institute of Precision Medicine, The First Affiliated Hospital of Sun Yat-sen University, Guangzhou, Guangdong, 510080, People's Republic of China

<sup>4</sup>Department of Laboratory Medicine, The First Affiliated Hospital of Sun Yat-sen University, Guangzhou, Guangdong, 510080, People's Republic of China

<sup>5</sup>Department of Medical Affairs, The First Affiliated Hospital of Sun Yat-sen University, Guangzhou, Guangdong, 510080, People's Republic of China

<sup>6</sup>Department of Endocrinology, The First Affiliated Hospital of Sun Yat-sen University, Guangzhou 510080, People's Republic of China

# These authors contributed equally to this work.

\*Correspondence to: Haipeng Xiao (xiaohp@mail.sysu.edu.cn), Hui Zhang (zhangh656@mail.sysu.edu.cn), Ji Wang (wangj683@mail.sysu.edu.cn)

**S. Table 1. Demographics and vaccination-related adverse events**

|                      |                    | Morning group | Afternoon group | Total        |
|----------------------|--------------------|---------------|-----------------|--------------|
| Participants, N      |                    | 25            | 25              | 50           |
| Age, mean (SD)       |                    | 26.88 (4.86)  | 27.88 (6.93)    | 27.38 (5.94) |
| Gender, male (%)     |                    | 9 (36.0)      | 11 (44.0)       | 26 (41.3)    |
| Adverse events,      | N (%)              | 5 (20.0%)     | 1 (4.0%)        | 6 (12.0%)    |
| Injection site       | Induration, N (%)  | 1 (4.0%)      | 0 (0.0%)        | 1 (2.0%)     |
| symptoms             | Swollen, N (%)     | 1 (4.0%)      | 0 (0.0%)        | 1 (2.0%)     |
| Systematic symptoms  | Fever, N (%)       | 2 (8.0%)      | 0 (0.0%)        | 2 (4.0%)     |
|                      | Fatigue, N (%)     | 2 (8.0%)      | 1 (4.0%)        | 3 (6.0%)     |
| Respiratory symptoms | Runny nose, N (%)  | 1 (4.0%)      | 0 (0.0%)        | 1 (2.0%)     |
|                      | Cough, N (%)       | 1 (4.0%)      | 0 (0.0%)        | 1 (2.0%)     |
|                      | Sore throat, N (%) | 1 (4.0%)      | 0 (0.0%)        | 1 (2.0%)     |

S. Table 2. **Demographics of the COVID-19 convalescent patients**

| <b>Patient ID</b> | <b>Age range</b> | <b>Gender</b> | <b>Days post-diagnosis</b> | <b>NAbs* (AU/ml)</b> |
|-------------------|------------------|---------------|----------------------------|----------------------|
| #1                | 21-25            | F             | 407                        | 28.67                |
| #2                | 36-40            | F             | 406                        | 582.92               |
| #3                | 31-35            | F             | 411                        | 14.79                |
| #4                | 36-40            | M             | 409                        | 74.09                |
| #5                | 46-50            | F             | 403                        | 23.55                |

\*NAbs: neutralizing antibodies

S. Table 3. **Antibodies used in this study.**

| <b>Marker</b> | <b>Fluorophore</b> | <b>Vendor</b> | <b>Cat#</b> | <b>Clone</b> |
|---------------|--------------------|---------------|-------------|--------------|
| CD4           | BV510              | Biologend     | 357420      | A161A1       |
| CD8           | Percp              | Biologend     | 344708      | SK1          |
| CD45RA        | BV650              | Biologend     | 304136      | HI100        |
| CD3           | Pacific Blue™      | Biologend     | 300330      | HIT3a        |
| CD137         | PE                 | Biologend     | 309804      | 4B4-1        |
| OX40          | BV605              | Biologend     | 350028      | ACT35        |
| CD69          | Super Bright 436   | Invitrogen    | 62-0699-42  | FN50         |
| CCR7          | APC/cy7            | Biologend     | 353212      | G043H7       |
| CD19          | PE/cy7             | Biologend     | 302216      | HIB19        |
| PD-1          | PE/cy7             | Biologend     | 367414      | NAT105       |
| CXCR5         | BV711              | Biologend     | 356934      | J252D4       |
| CD27          | AF700              | Biologend     | 356416      | M-T271       |
| IgD           | FITC               | Biologend     | 348206      | IA6-2        |
| CD38          | BV650              | Biologend     | 356620      | HB-7         |
| IgM           | BV605              | Biologend     | 314524      | MHM-88       |
| IgG           | AF647              | Biologend     | 302216      | HIB19        |
| IgA           | PE                 | Biologend     | 333504      | HM47         |
| Zombie        | Zombie Red         | Biologend     | 423110      | —            |
| Streptavidin  | BV421              | Biologend     | 405226      | —            |
| Streptavidin  | BV510              | Biologend     | 405233      | —            |
| Streptavidin  | BV785              | Biologend     | 405249      | —            |

## Supplementary Figures and legends

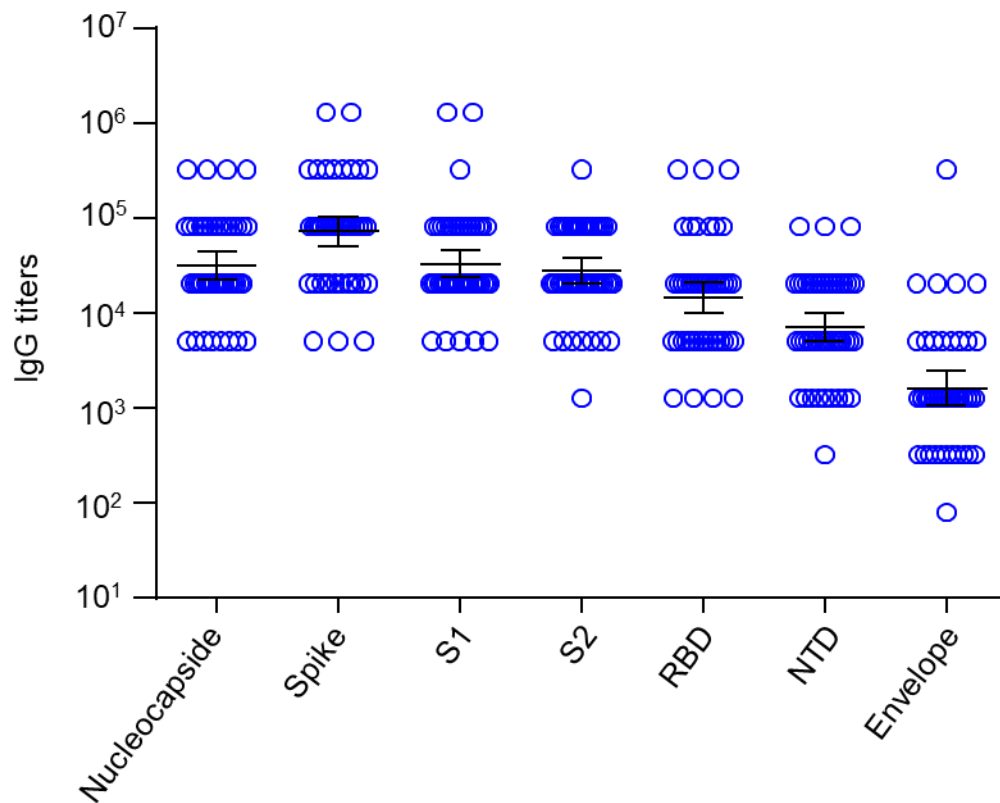

Supplementary Fig. 1. **Antibody spectrum induced by inactivated vaccine BBIBP-CorV.** Study was carried out as in Fig.1. Antibodies against SARS-CoV-2 nucleocapsid, spike, spike S1, spike S2, receptor-binding domain (RBD), spike N terminal domain (NTD) and envelope in the serum samples from day 194 were measured by ELISA (n=50).

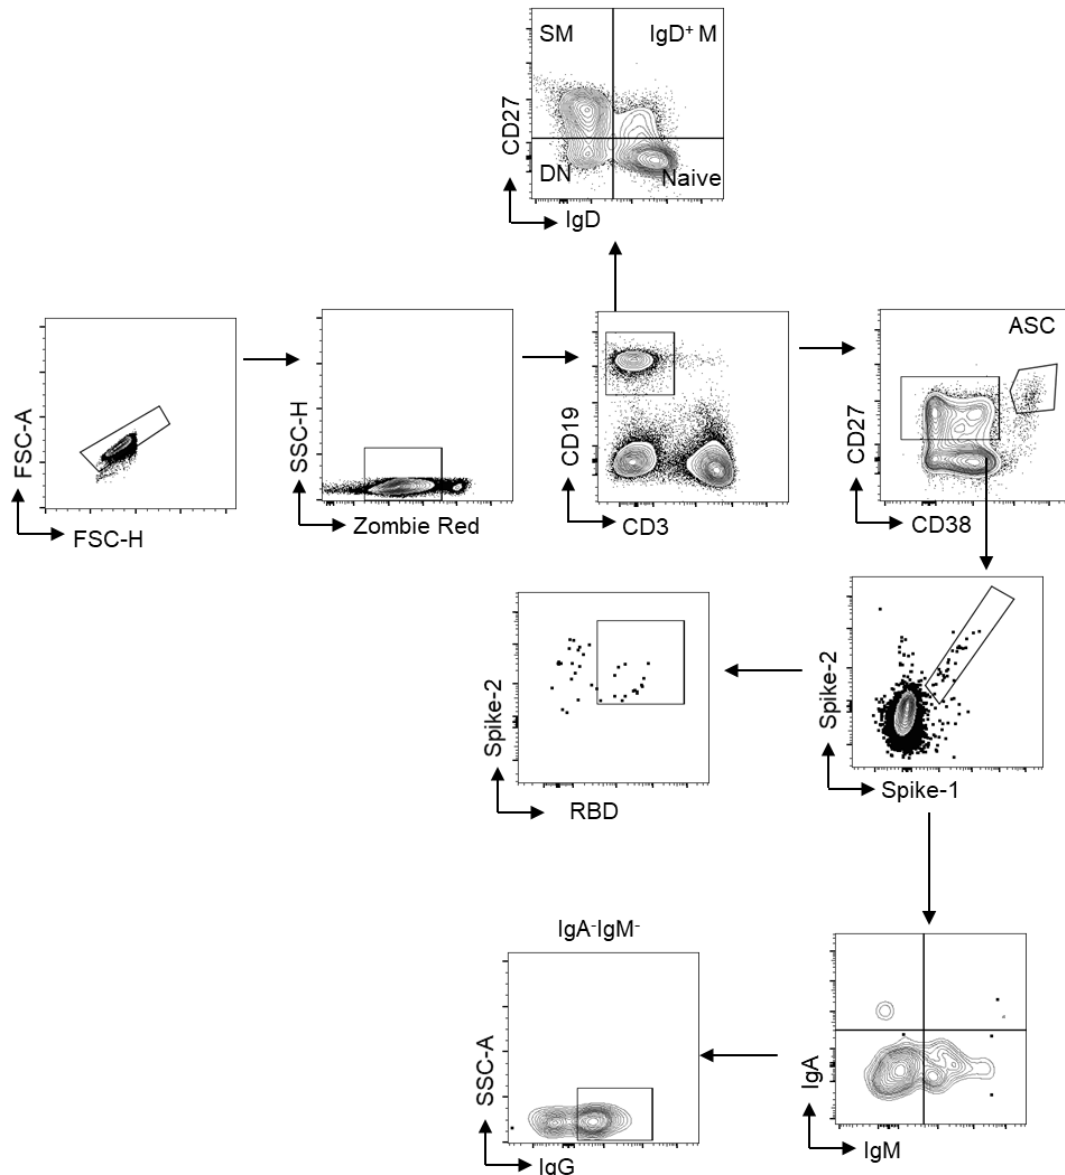

S. Fig. 2. **Gating strategy for B cell analysis.** PBMCs were collected on day (d) 180 before the third dose and d187 after the third dose vaccination. Cells were stained with antibodies against CD3, CD19, CD27, IgD, IgM, IgG, IgA and CD38. Dead cells were first gated out by gating on Zombie Red<sup>-</sup> population. Cells were then gated on CD19<sup>+</sup> B cells for further analysis: naïve B cells: IgD<sup>+</sup>CD27<sup>-</sup>, IgD<sup>+</sup> memory B cells: IgD<sup>+</sup>CD27<sup>+</sup>, switched memory B cells: IgD<sup>-</sup>CD27<sup>+</sup>, double-negative (DN) B cells: IgD<sup>-</sup>CD27<sup>-</sup>, antibody-secreting cells (ASC): CD38<sup>+</sup>CD27<sup>+</sup>.

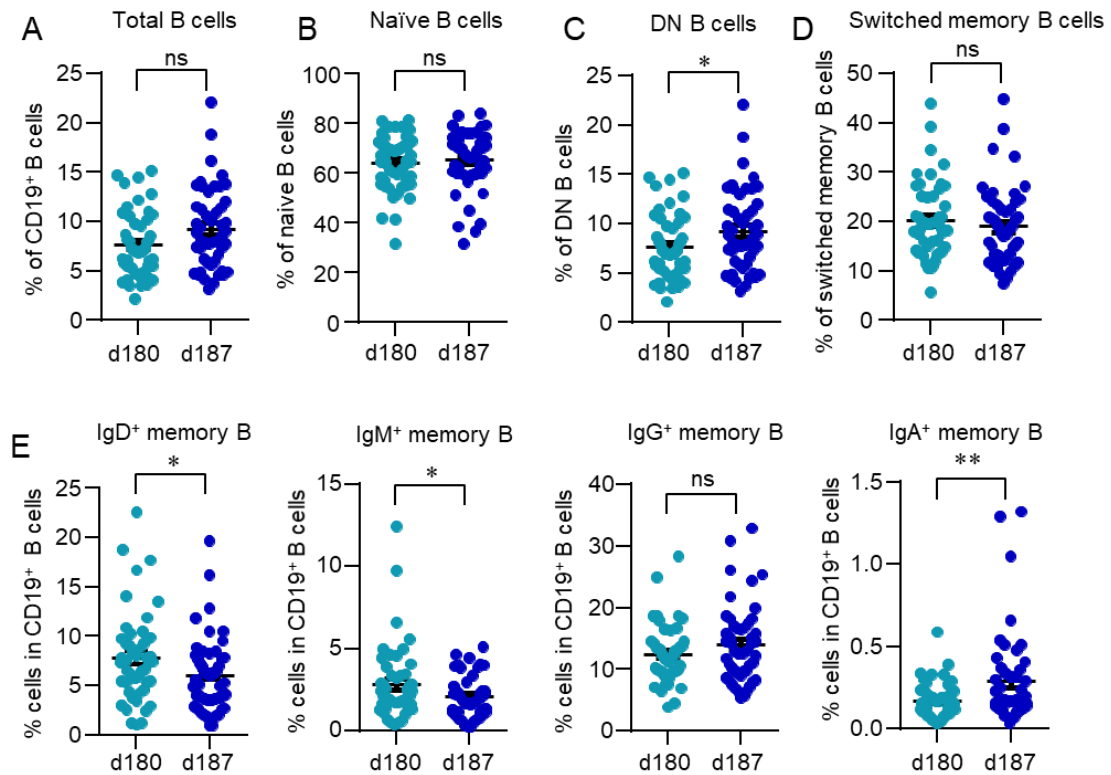

S. Fig. 3. **B cell response to a third dose of inactivated SARS-CoV-2 vaccine.** Blood samples were collected on day (d) 180 and d187. Data were acquired by flow cytometry. The gating strategy is shown in S. Fig. 2. B cell subsets were summarized and shown as dot plots. Data are expressed mean  $\pm$  SEM. \*p<0.05, \*\*p<0.01. Comparisons were done by Student's t test. ns: not significant.

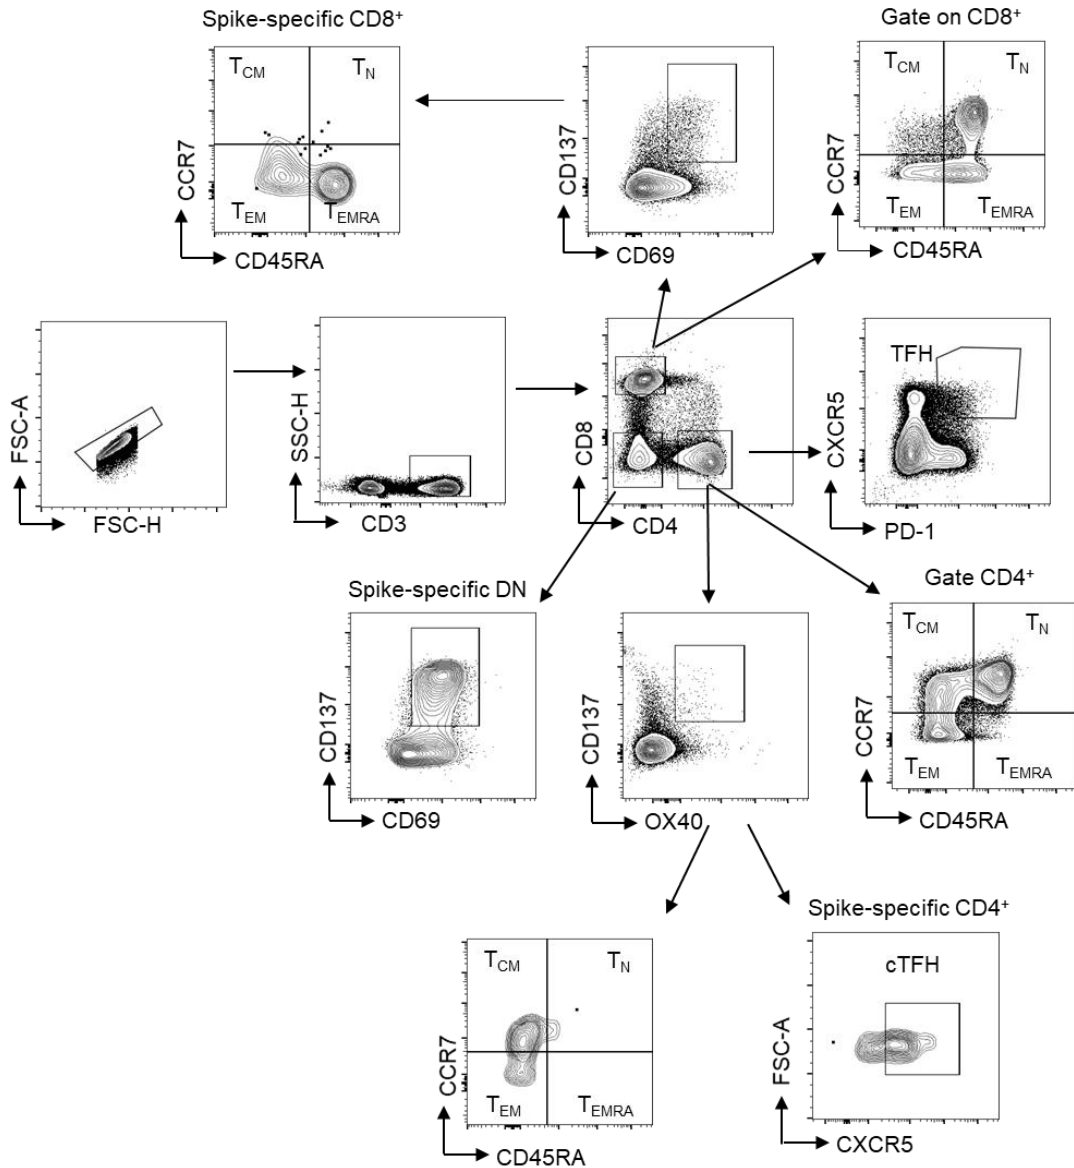

S. Fig. 4. **Gating strategy for T cell analysis.** PBMCs were collected on day (d) 180 before the third dose and d187 after the third dose vaccination. Cells were stained with antibodies against CD3, CD4, CD8, IgD, IgM, IgG, IgA and CD38. T cell phenotyping: TFH cells: CD4<sup>+</sup>CXCR5<sup>+</sup>PD-1<sup>+</sup>, Spike-specific CD4<sup>+</sup> T cells: OX40<sup>+</sup>4-1BB<sup>+</sup>, Spike-specific CD8<sup>+</sup> T cells: CD69<sup>+</sup>4-1BB<sup>+</sup>, naïve T cells (T<sub>N</sub>): CD45RA<sup>+</sup>CCR7<sup>+</sup>, effector memory T cells (T<sub>EM</sub>): CD45RA<sup>-</sup>CCR7<sup>-</sup>, central memory T cells (T<sub>CM</sub>): CD45RA<sup>-</sup>CCR7<sup>+</sup>, terminally differentiated T cells (T<sub>EMRA</sub>): CD45RA<sup>+</sup>CCR7<sup>-</sup>.



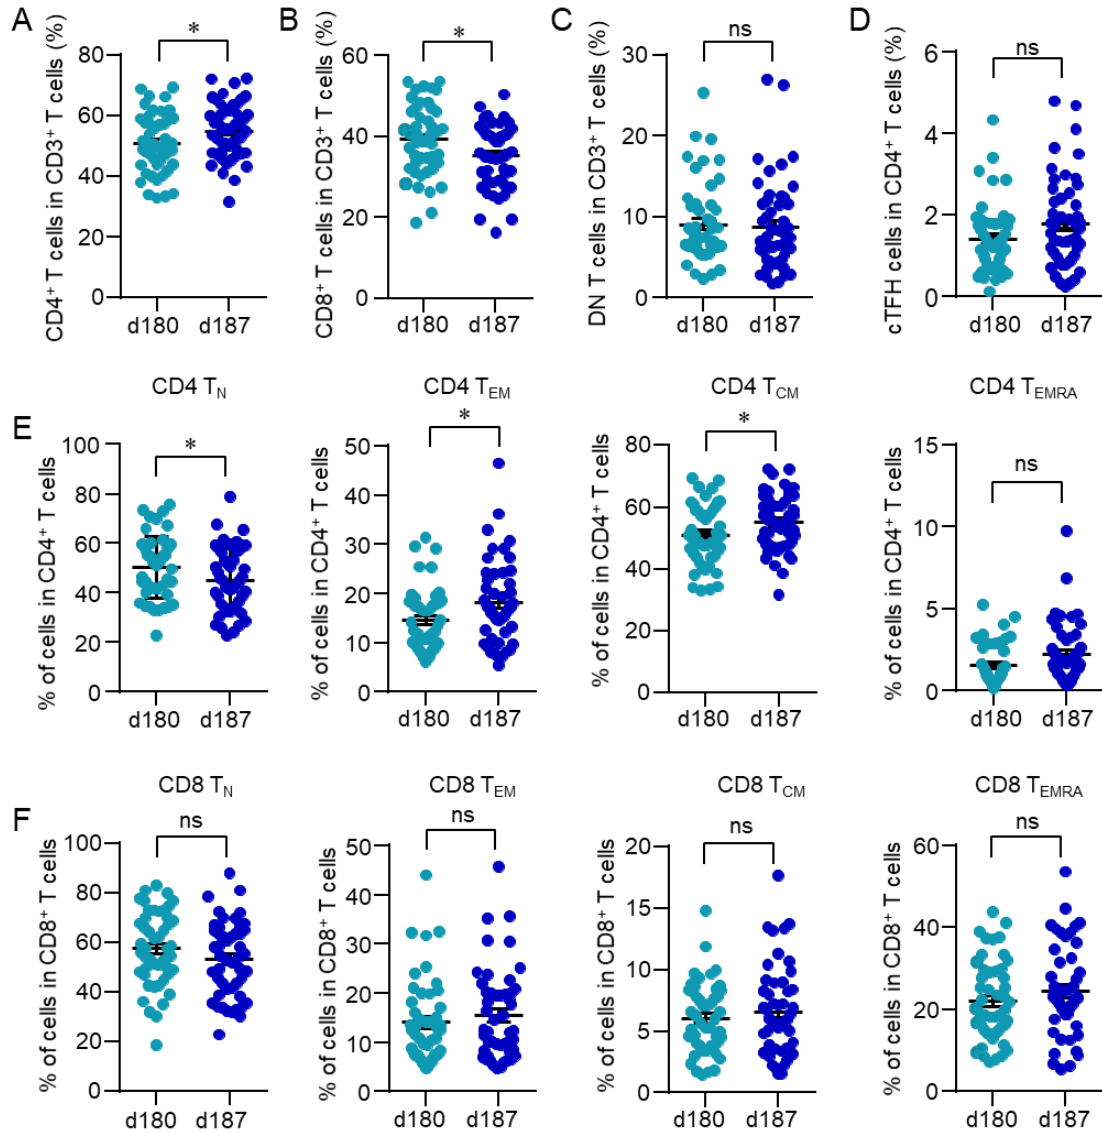

S. Fig. 5. **T cell response to a third dose of inactivated SARS-CoV-2 vaccine.** Blood samples were collected on day (d) 180 and d187. Data were acquired by flow cytometry. The gating strategy is shown in S. Fig. 4. T cell subsets were summarized and shown as dot plots. Data are expressed mean  $\pm$  SEM. \* $p < 0.05$ , Comparisons were done by Student's t test. ns: not significant.

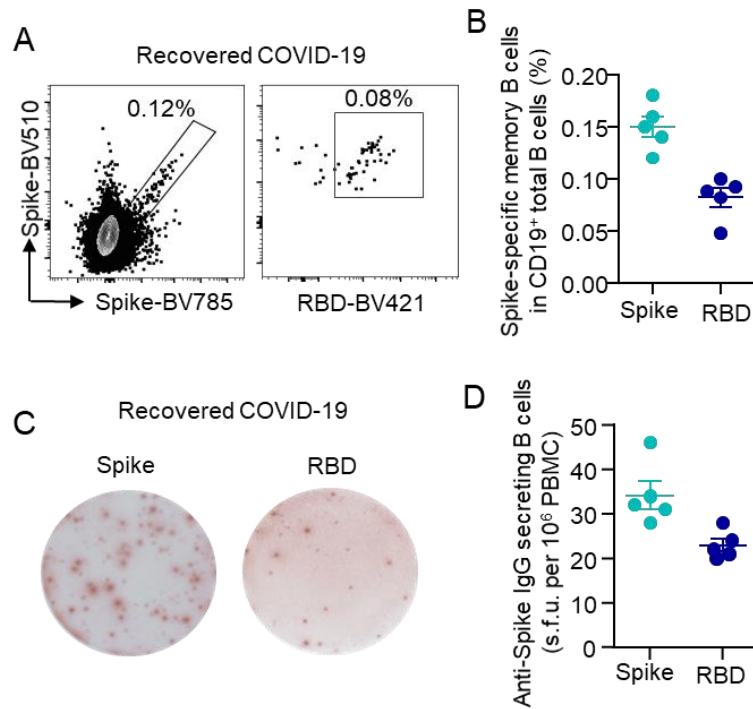

S. Fig. 6. **SARS-CoV-2-specific memory B cells in COVID-19 convalescent patients.** PBMCs were isolated from patients who have recovered from COVID-19 over 13 months. (A, B) Spike- and receptor-binding domain (RBD)-specific memory B cells were measured by flow cytometry. Representative FACS plots showing spike- and RBD-specific memory B cells. Data were summarized from 5 independent samples. (C, D) SARS-CoV-2-specific memory B cells were further detected by ELISpot. Images of ELISpot wells were shown. Spot-forming units (s.f.u) were summarized and adjusted to 10<sup>6</sup> PBMCs.

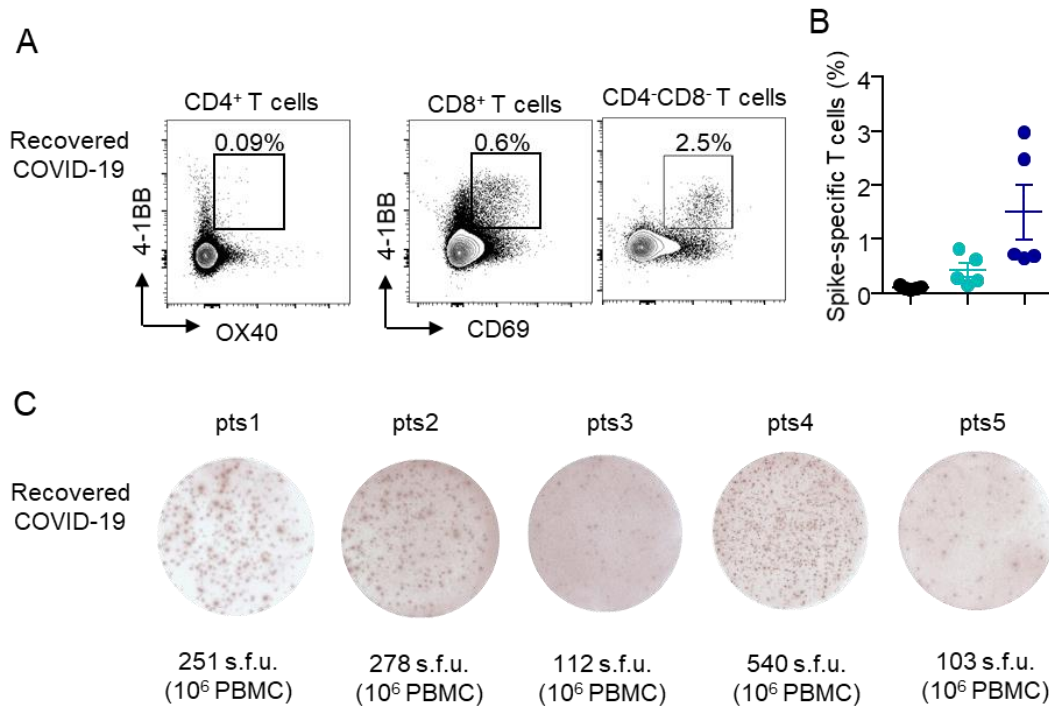

S. Fig. 7. **SARS-CoV-2-specific T cells in COVID-19 convalescent patients.**

PBMCs were isolated as in S. Fig. (A, B) PBMCs were stimulated with spike peptide pool (2 $\mu$ g/ml) for 12 h. Specific-specific CD4<sup>+</sup> T cells (OX40<sup>+</sup>4-1BB<sup>+</sup>), CD8<sup>+</sup> T cells (CD69<sup>+</sup>4-1BB<sup>+</sup>) and CD3<sup>+</sup>CD4<sup>-</sup>CD8<sup>-</sup> T cells (CD69<sup>+</sup>4-1BB<sup>+</sup>) were measured by flow cytometry. Data were summarized from 5 independent samples. (C) SARS-CoV-2-specific T cells were further detected by IFN- $\gamma$  ELISpot. Images of ELISpot wells of each samples were shown. Spot-forming units (s.f.u) were summarized and adjusted to 10<sup>6</sup> PBMCs.
